# Supplementary material for: Assessment of pharmacokinetics, safety, and tolerability following twice‐daily administration of molnupiravir for 10 days in healthy participants
Source: PubMed Central journal article supplement — Clin Transl Sci. 2023 Aug 8;16(10):1947–56. doi: 10.1111/cts.13602 (PMC10582664; doi:10.1111/cts.13602), 2023-08-08
Supplement: CTS-16-1947-s001.pdf [file CTS-16-1947-s001.pdf]

## Supplementary Materials

**Figure S1. Assessment of Dose Proportionality for Plasma NHC (A)  $AUC_{0-12}$  and (B)  $C_{max}$  on Day 11 Following Administration of Multiple Oral Doses of Molnupiravir Every 12 Hours for 10.5 Days to Healthy Participants ( $n = 6$  for 400 mg,  $n = 6$  for 600 mg,  $n = 12$  for 800 mg)**

**A**

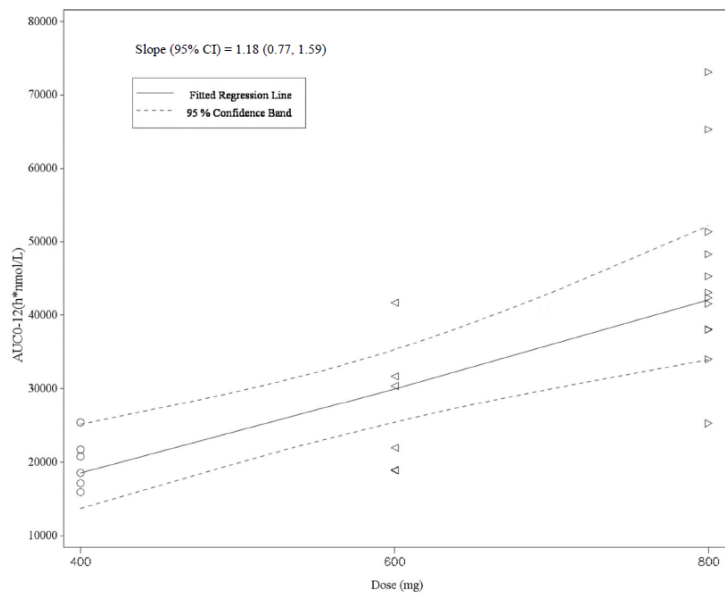

**B**

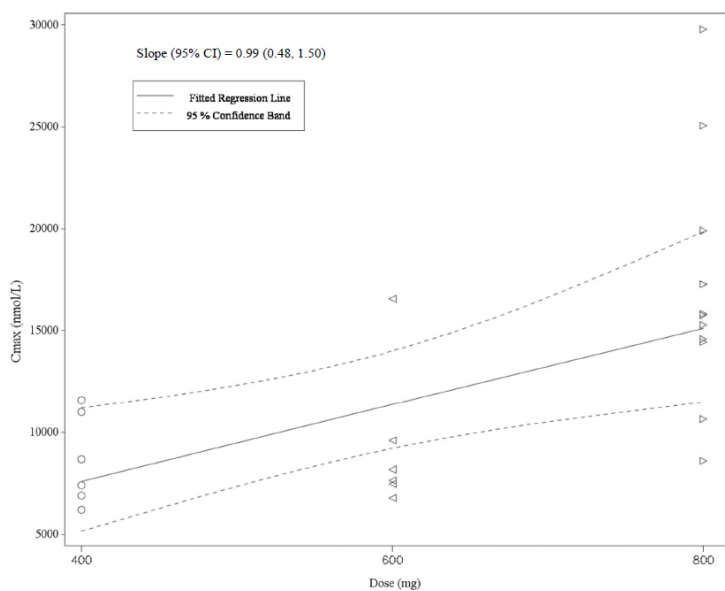

CI, confidence interval; NHC,  $\beta$ -D-N4-hydroxycytidine

A true slope of 1.0 indicates perfect dose proportionality. Least-squares estimate and confidence interval from linear mixed-effects model including  $\ln$ -dose as a continuous effect, performed on natural log-transformed values.
